# Supplementary material
Source: PubMed Central journal article supplement (PMC8637942)
Supplement: NIHMS1751007-supplement-2.pdf [file NIHMS1751007-supplement-2.pdf]

## **Supplemental Information**

**Controlling tissue patterning by translational regulation of signaling transcripts through the core translation factor eIF3c.**

**Kotaro Fujii, Olena Zhulyn, Gun Woo Byeon, Naomi Rebecca Genuth, Craig Howard Kerr, Erin Murray Walsh, and Maria Barna**

# Sup\_Fig.1

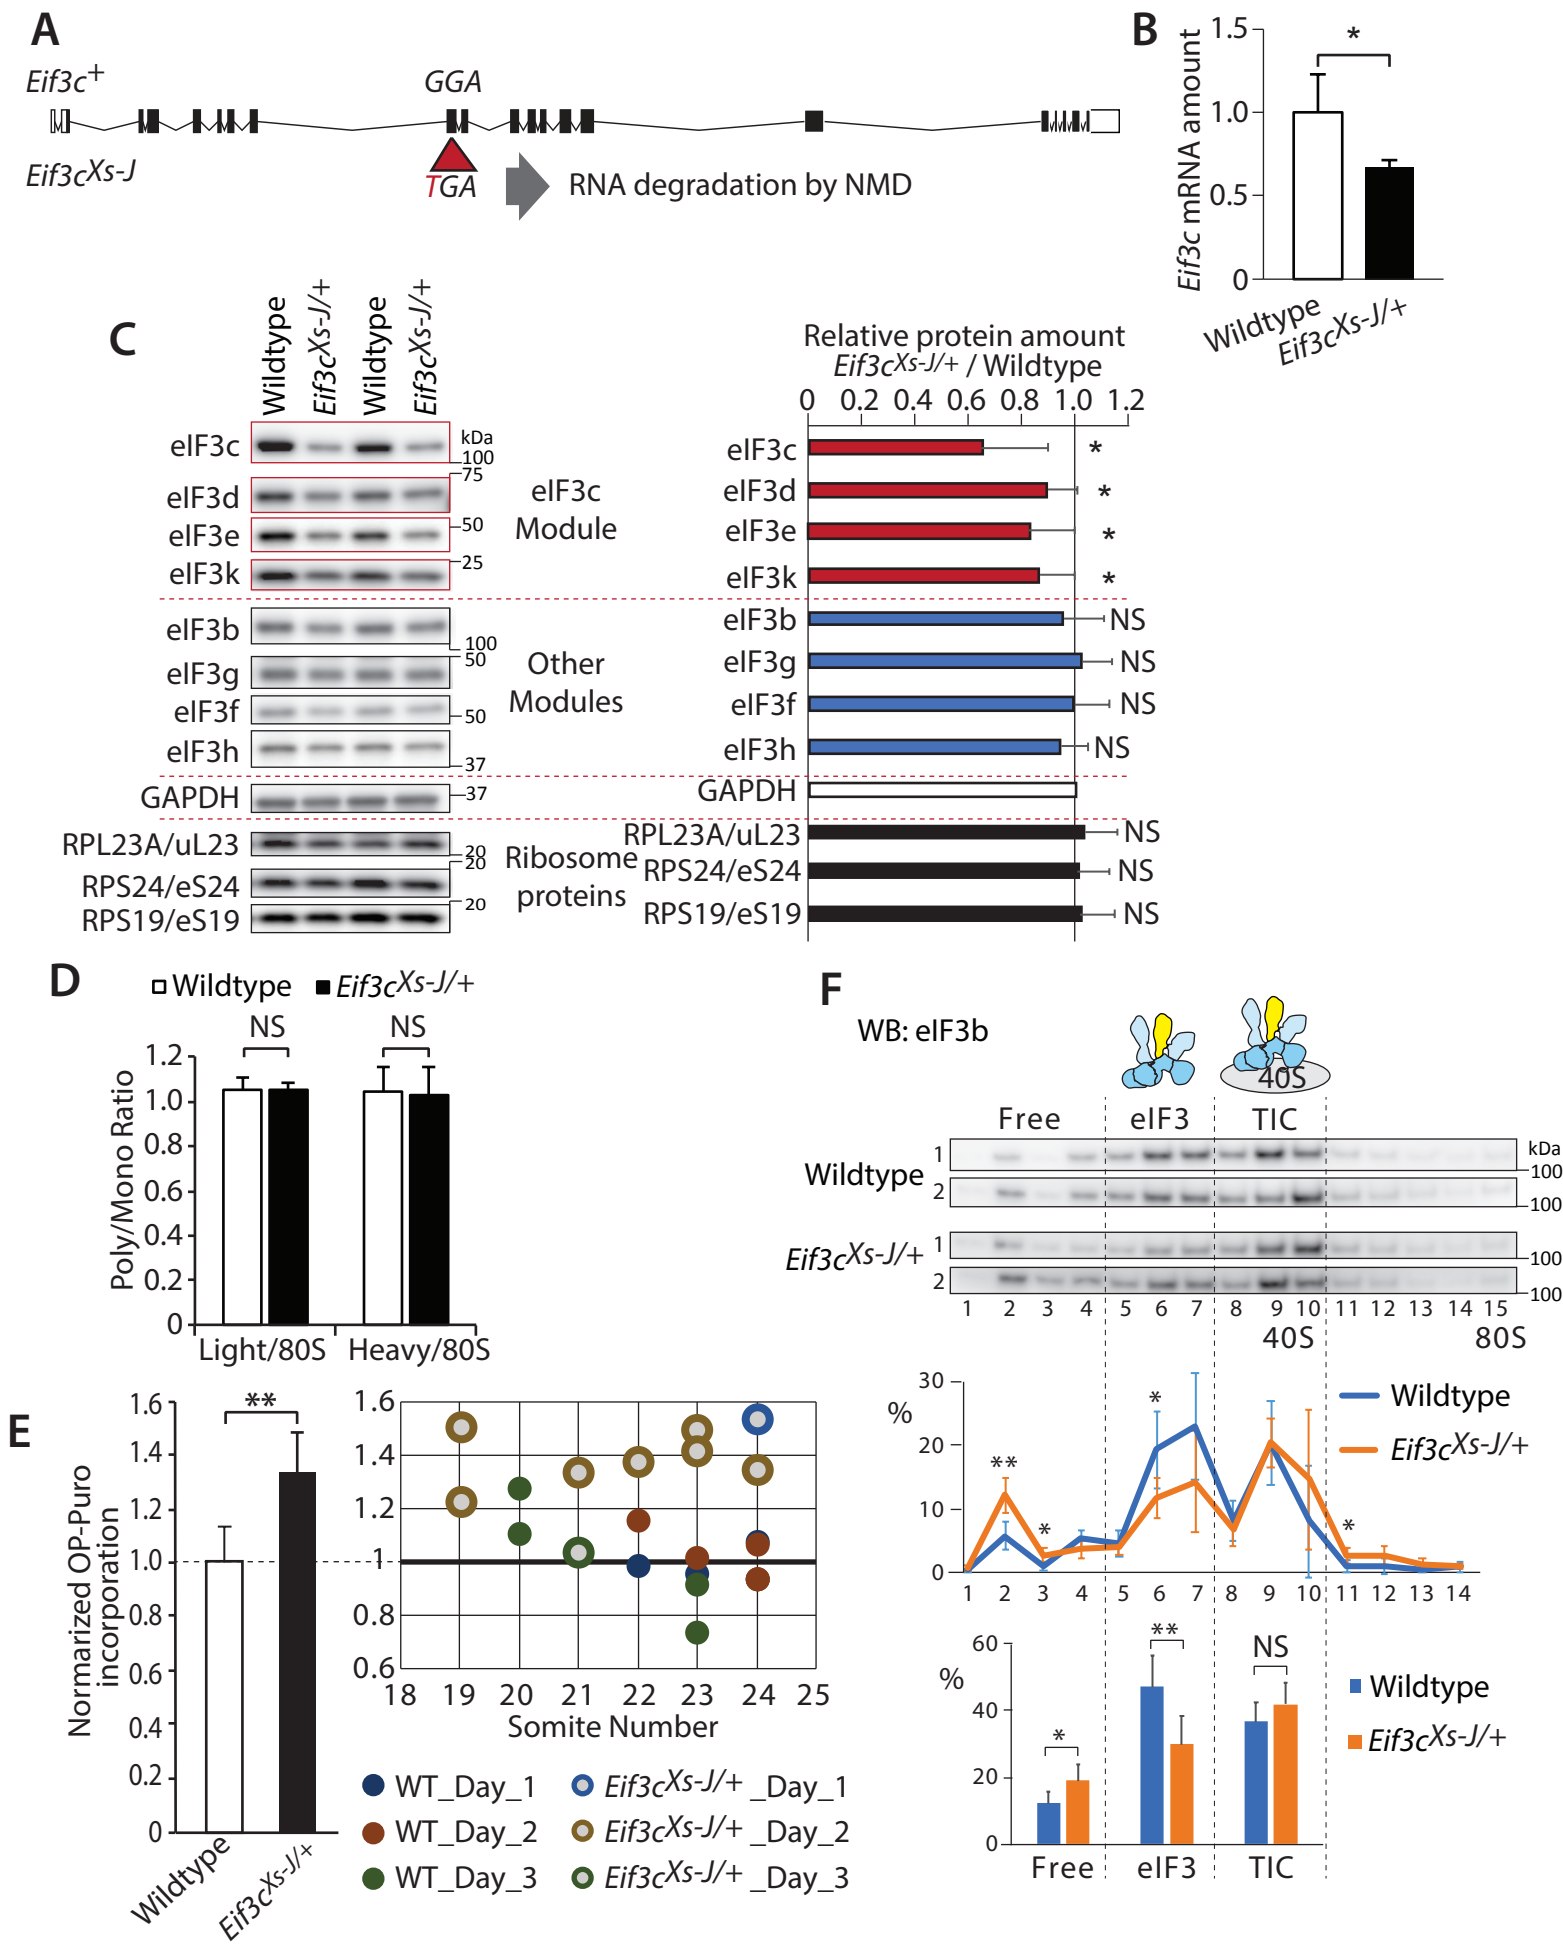

**Figure S1. Characterization of molecular phenotype of *Eif3c*<sup>Xs-J/+</sup> mice. Related to Figure 1.**

**(A)** Showing spontaneous point mutation from G to T in the *Eif3c*<sup>Xs-J</sup> allele, which create a nonsense stop codon, which induces nonsense mediated decay (NMD). **(B)** RT-qPCR in wildtype and *Eif3c*<sup>Xs-J/+</sup> E11.5 embryos for *Eif3c* mRNA normalized by *Actb* mRNA (t-test, n≥4). (Error bars represent s.d.; \*P<0.05) **(C)** Western blotting for eIF3 subunits in wildtype and *Eif3c*<sup>Xs-J/+</sup> E9.5 whole embryos. Right are quantification by ImageJ normalized by GAPDH protein (t-test, n≥6). (Error bars represent s.d.; \*P<0.05) **(D)** Shown are the quantification of polysome as actively translating ribosomes from Figure 1A. Light or heavy polysomes were normalized by 80S monosome amount. Error bars represent s.d. NS: not significant (t-test, n≥4). **(E)** Global translation activity in E9.5 whole embryo of Wildtype (n=13) or *Eif3c*<sup>Xt-J/+</sup> (n=8). Global protein synthesis was monitored by O-propargyl-puromycin (OP-Puro), in E9.5 whole embryos quantified by flow cytometry as the fluorescence activity of incorporated OP-Puro in nascent protein. Global protein synthesis in *Eif3c*<sup>Xs-J/+</sup> mutant embryos did not decrease and, if anything, a subtle increase is observed (t-test, \*\*p<0.01) Right: Shown are individual data points. Each dot indicates individual embryos. Filled circles are wildtype and open circles are *Eif3c*<sup>Xs-J/+</sup> embryos. Each color indicates the day of the assay. **(F)** Fractionation of the eIF3-40S translation initiation complex (TIC). The eIF3 complex in each fraction was monitored by the eIF3b subunit whose amount did not change in *Eif3c*<sup>Xt-J/+</sup> embryos (Figure S1C). eIF3b signal from the fraction containing the eIF3 complex was reduced by around 20%, and correspondingly a slight increase in eIF3b in the free fraction not part of the translation initiation complex was also observed. In good agreement with the normal global protein synthesis in *Eif3c*<sup>Xt-J/+</sup> embryos (Figure 1A and S1D-E), the eIF3-40S TIC amount was not changed between Wildtype and *Eif3c*<sup>Xt-J/+</sup> embryos. (t-test; \*\*p<0.01; \*p<0.05; NS, not significant)

A

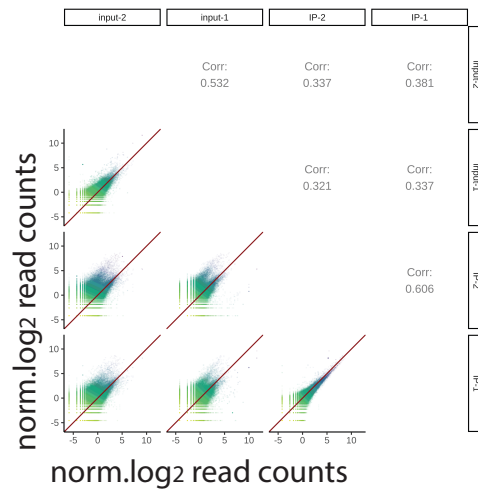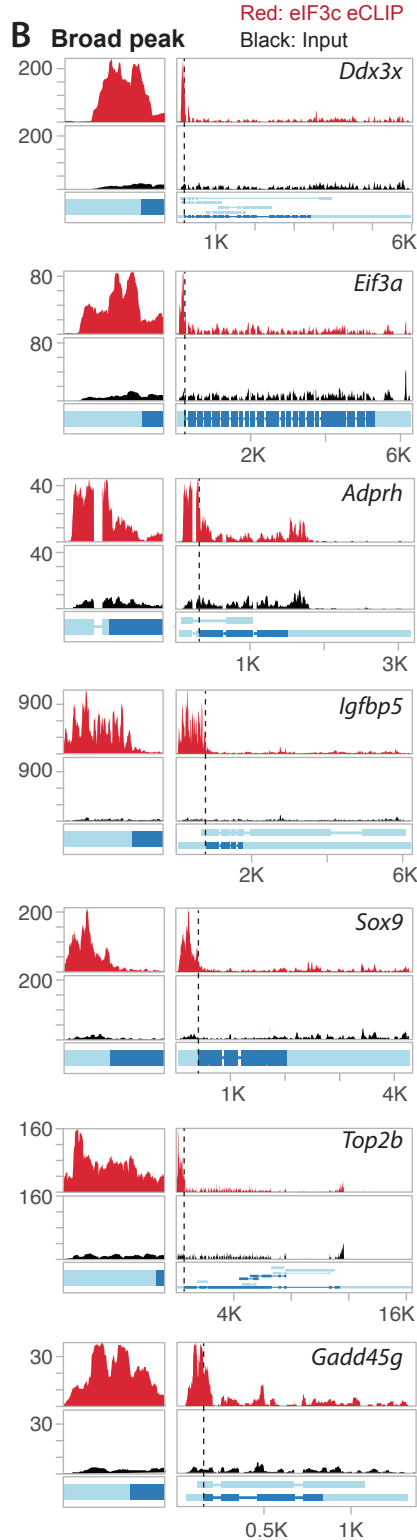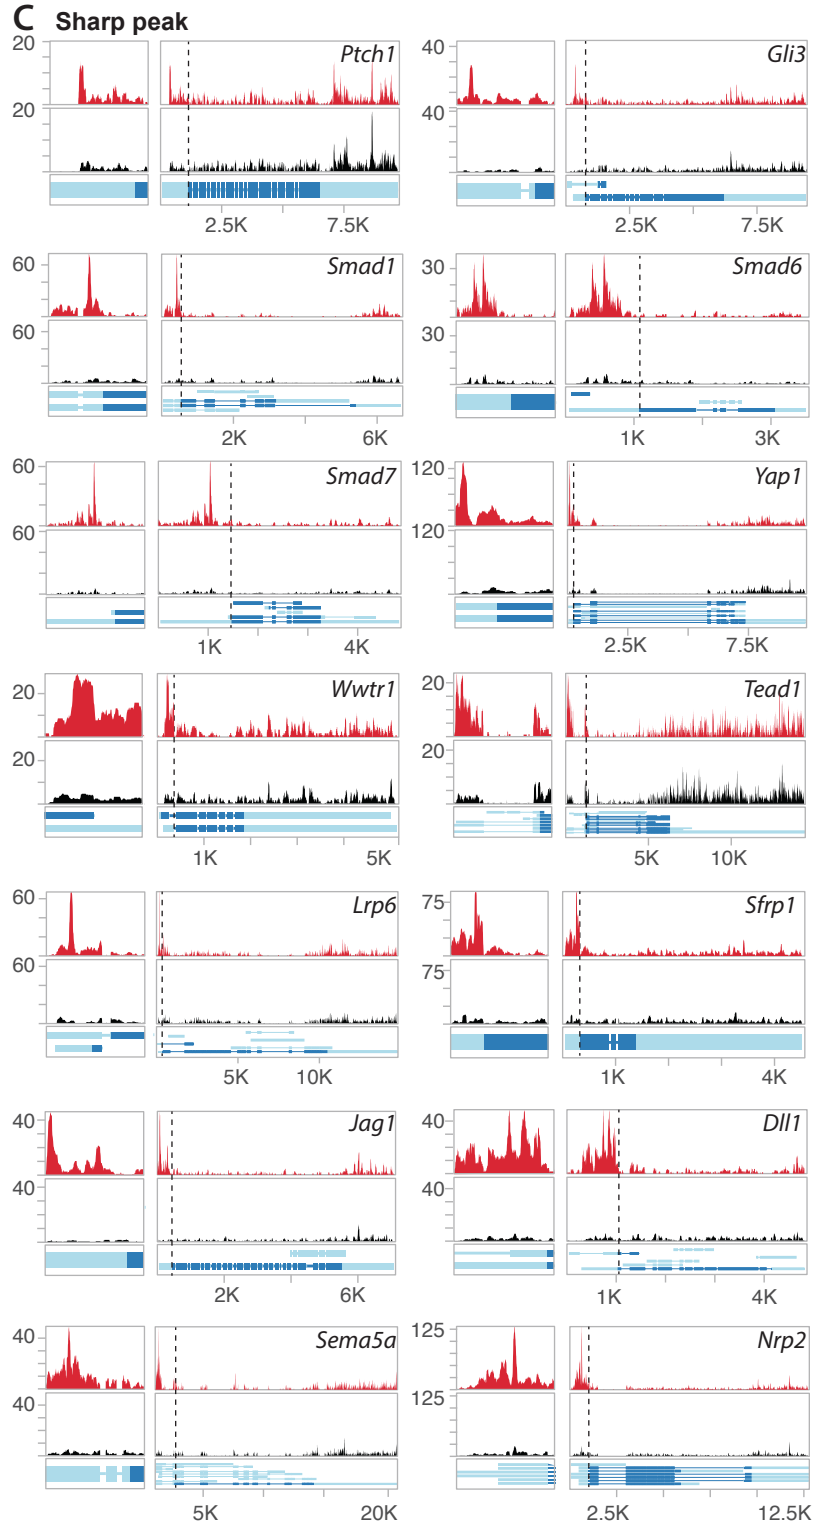

**Figure S2 Basic analysis of the eIF3c eCLIP-seq dataset. Related to Figure 2.**

**(A)** Plot of pairwise correlations of all CLIP and Input sequence datasets confirms the consistency of biological replicates. **(B-C)** eIF3c eCLIP (Red) and input (Black) plots of several transcripts having broad enrichment in 5'-UTRs (B) and transcripts having distinct sharp peak in 5'-UTRs (C).

# Sup\_Fig.3

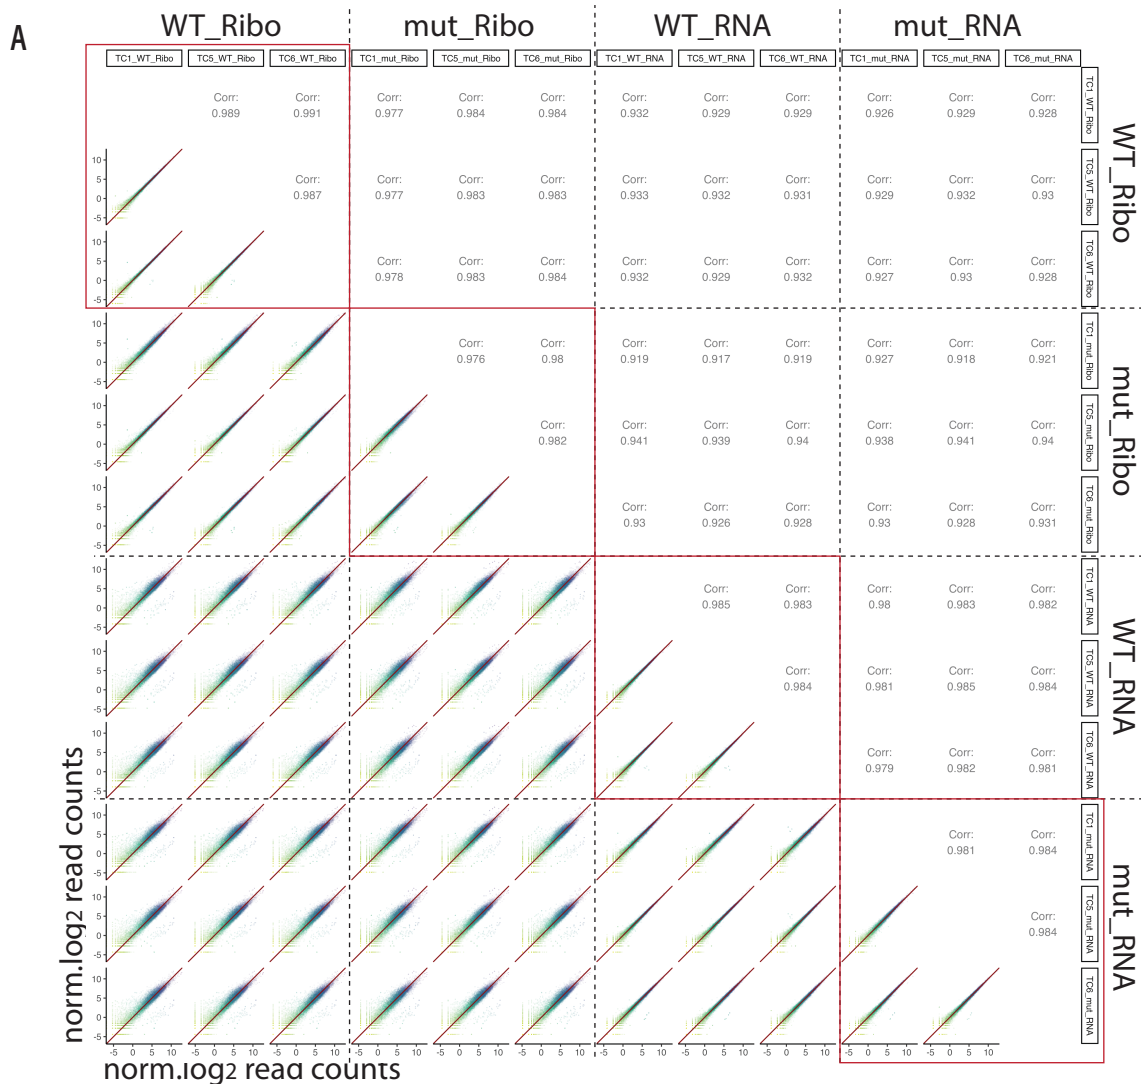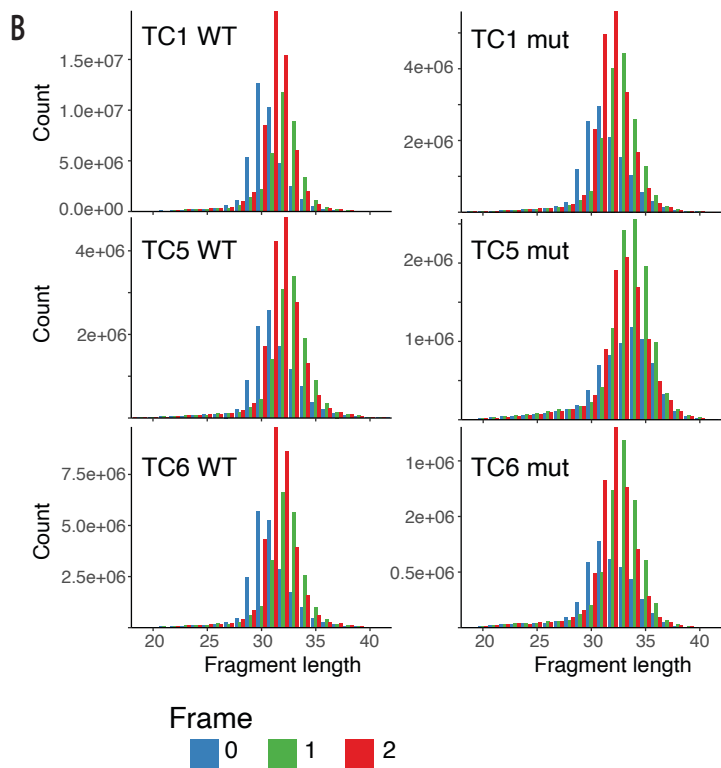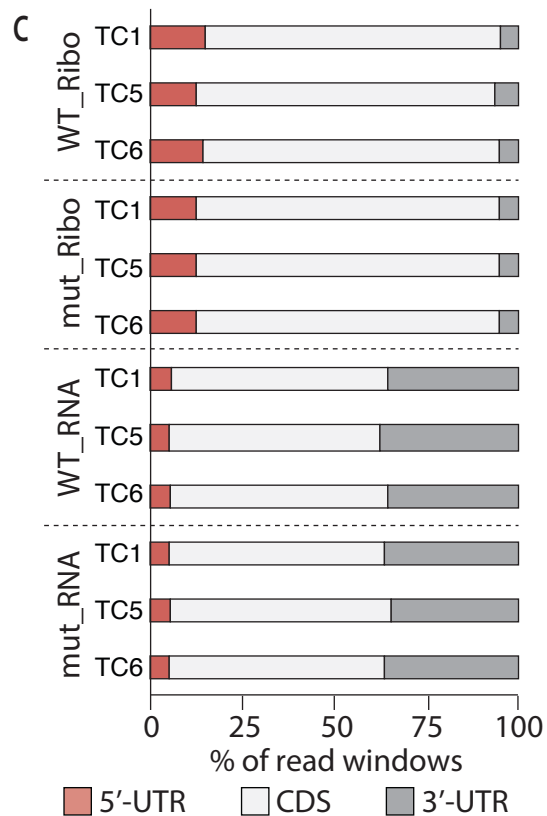

**Figure S3 Basic analysis of the ribosome profiling dataset from wildtype and *Eif3c*<sup>Xs-J/+</sup> embryos.**

**Related to Figure 2.**

**(A)** Plot of pairwise correlations of all Ribo-seq and RNA-seq datasets confirms the consistency of biological replicates. **(B)** Read length and CDS reading frame distribution for ribosome protected fragments (RPF) aligning to annotated ORFs in a representative library. **(C)** Proportion of reads aligning to CDS, 5'-UTR, and 3'-UTR regions from Ribo-seq and RNA-Seq libraries. CDS enrichment for ribosome protected fragments are expected.

# Sup\_Fig.4

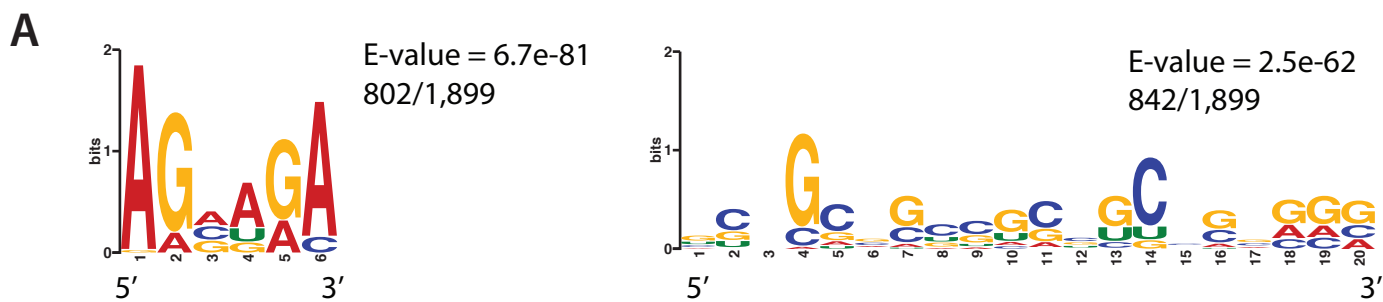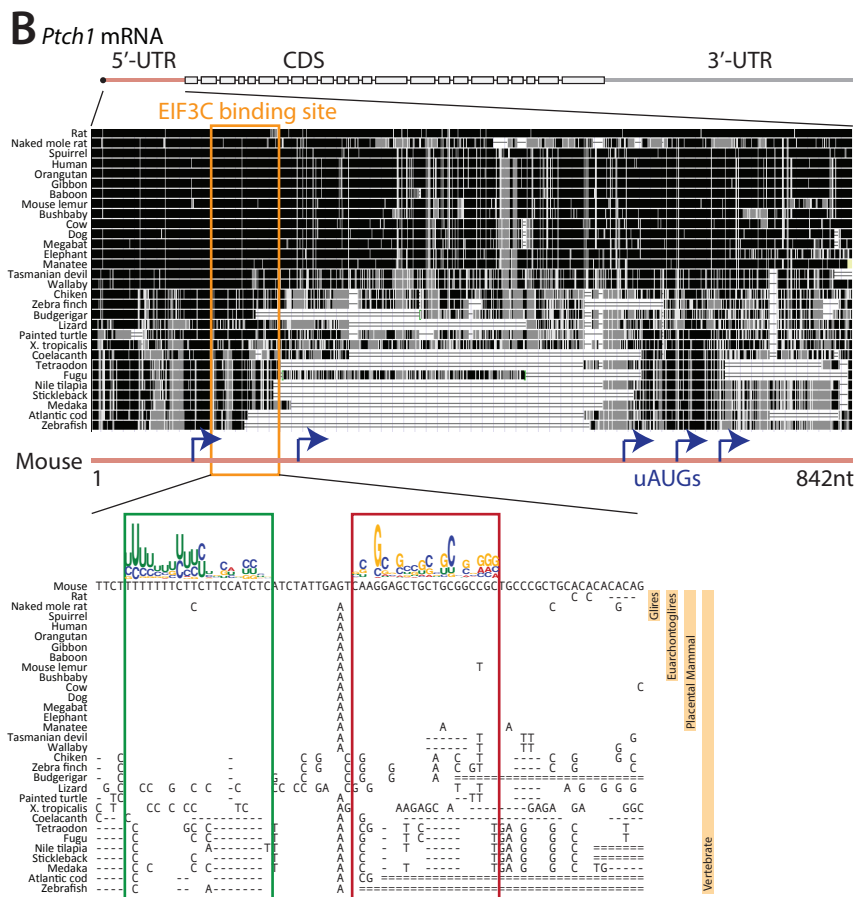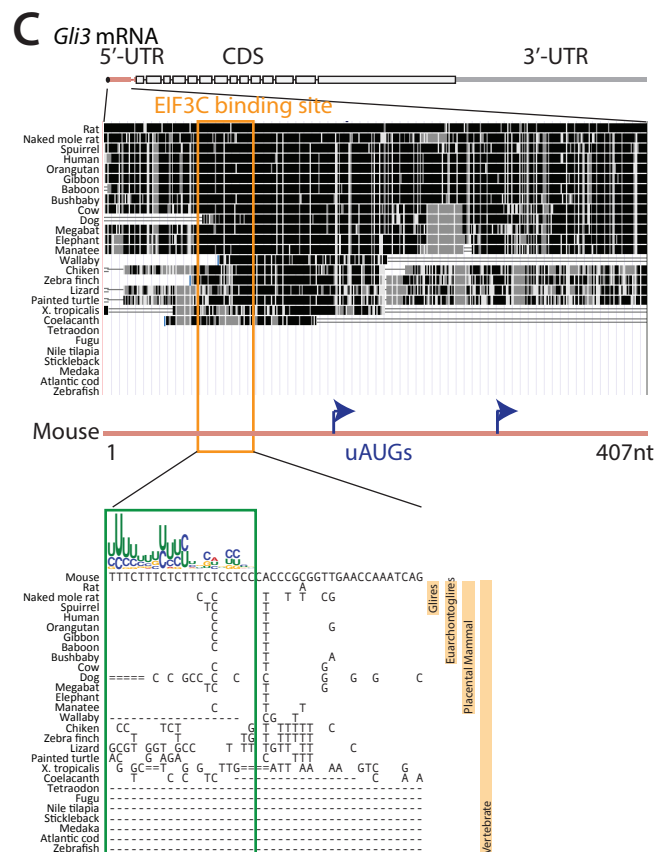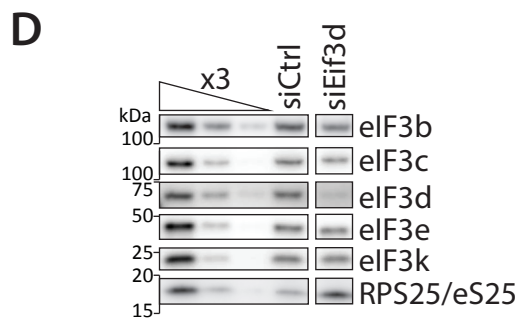



**Figure S4. The eIF3 binding motifs in 5'-UTRs are highly conserved across vertebrates. Related to Figure 3.**

(A) MEME motif analysis identified AG and GC rich motifs in the distinct eIF3 binding peak. (B-C) Alignment of the mouse *Ptch1* (B) or *Gli3* (C) 5'-UTRs across other vertebrate species from UCSC genome browser. The eIF3 binding sites are zoomed in and showing conservation in nucleotide resolution. Pyrimidine (UC) rich and GC rich motifs are shown in Green and Red rectangles, respectively. **(D)** Western blotting against several eIF3 subunits shows specific siRNA knock down of the eIF3d subunit by siRNA.
